# Supplementary material for: Oxypeucedanin: Chemotaxonomy, Isolation, and Bioactivities
Source: MDPI journal article supplement (doi:10.3390/plants10081577), 2021-07-30
Supplement: s1 [file s1]

**Table S1.** Biological activities of oxypeucedanin.

| Activity       | Isolated from<br>plant<br>species/purchased | Measured activity                                                                                              | Assay                                                        | Experimented<br>media | Positive control/activity | Cell line/strain                    | Reference |
|----------------|---------------------------------------------|----------------------------------------------------------------------------------------------------------------|--------------------------------------------------------------|-----------------------|---------------------------|-------------------------------------|-----------|
| Anti-allergic  | <i>Angelica dahurica</i>                    | HC: 12.6 ± 1.75 µg/100 mL cavity fluids (at 10 mg/kg)<br>HC: 12.2 ± 1.00 µg/100 mL cavity fluids (at 25 mg/kg) | Measuring of histamine content                               | in vivo/mice          | nd/142.6%                 | -                                   | [26]      |
| Antiarrhythmic | <i>Angelica dahurica</i>                    | IC <sub>50</sub> : 76.12 ± 8.07 nM                                                                             | hKv1.5 channel inhibitory                                    | ex vivo/mice          | -                         | clonal mouse <i>Ltk</i> -           | [16]      |
| Anticonvulsant | <i>Peucedanum ostruthium</i>                | no activity (at 300 mg/kg)                                                                                     | maximal electroshock-induced seizure                         | in vivo/mice          | -                         | -                                   | [101]     |
|                | purchased                                   | EC <sub>50</sub> : 26 ± 8 µM<br>I <sub>GABA</sub> : 550 ± 71% (at 100 µM)                                      | I <sub>GABA</sub> : GABA-induced chloride current modulation | ex vivo/frog          | -                         | ovary                               | [102]     |
| Antifeedant    | purchased                                   | ED <sub>50</sub> : 41.92 ± 18.74 mg/L                                                                          | leaf-disk bioassay                                           | in vitro              | -                         | <i>Spodoptera littoralis</i> larvae | [103]     |
|                | <i>Skimmia japonica</i>                     | AI: 19.83 ± 6.91% (at 1 mg/mL)                                                                                 | leaf-disk bioassay                                           | -                     | AI: 23.62 ± 9.64%         | <i>Spodoptera litura</i> larvae     | [68]      |
| Antigenotoxic  | No activity (on AF-2- and MNNG-induced)     |                                                                                                                |                                                              |                       |                           |                                     |           |
|                | <i>Angelica dahurica</i>                    | IC <sub>50</sub> : 1.69 ± 0.28 µM (on 26 µM PBTA-4, rat S9 mix)                                                | Umu Chromotest                                               | in vitro              | -                         | -                                   | [104]     |
|                |                                             | IC <sub>50</sub> : 0.24 ± 0.08 µM (on 26 µM PBTA-4, rat CYP1A1)                                                |                                                              |                       |                           |                                     |           |
|                |                                             | IC <sub>50</sub> : 30.14 ± 0.08 µM (on 26 µM PBTA-4, Human CYP1A1)                                             |                                                              |                       |                           |                                     |           |
|                |                                             | IC <sub>50</sub> : 2.49 ± 0.13 µM (on 0.016 µM MelQ, rat S9 mix)                                               |                                                              |                       |                           |                                     |           |

|                   |                           |                                                                                                                                                          |                           |          |                                                                                                                                                                                                                  |                                                                                                                           |      |
|-------------------|---------------------------|----------------------------------------------------------------------------------------------------------------------------------------------------------|---------------------------|----------|------------------------------------------------------------------------------------------------------------------------------------------------------------------------------------------------------------------|---------------------------------------------------------------------------------------------------------------------------|------|
|                   |                           | IC <sub>50</sub> : 0.96 ± 0.09 µM (on 0.016 µM MelQ, Rat CYP1A2)<br>IC <sub>50</sub> : 4.39 ± 0.32 µM (on 0.016 µM MelQ, Human CYP1A1)                   |                           |          |                                                                                                                                                                                                                  |                                                                                                                           |      |
|                   | <i>Angelica dahurica</i>  | No activity                                                                                                                                              | NO production assay       | in vitro | Dexamethasone (0.1 mM)                                                                                                                                                                                           | RAW 264.7 cell                                                                                                            | [81] |
| Anti-inflammatory | <i>Angelica dahurica</i>  | C: 100 pg/mL (secretion of TNF-α)<br>C: 120 pg/mL (secretion of IL-1β)<br>C: 39 pg/mL (secretion of IL-4)<br>C: 4.5 (on activation of nuclear factor-κB) | Luciferase assay          |          | DNP-HSA<br>C: 160 pg/mL (secretion of TNF-α)<br>C: 240 pg/mL (secretion of IL-1β)<br>C: 55 pg/mL (secretion of IL-4)<br>C: 7 (on activation of nuclear factor-κB)                                                | RBL-2H3                                                                                                                   | [28] |
|                   | <i>Angelica dahurica</i>  | IC <sub>50</sub> : 16.8 µg/mL                                                                                                                            | NO production assay/MTT   | In vitro | L-NAME (100 mM)                                                                                                                                                                                                  | Raw 264.7 macrophage cell                                                                                                 | [15] |
|                   | <i>Angelica furcijuga</i> | IC <sub>50</sub> : 57 µM                                                                                                                                 | NO production assay/MTT   | In vitro | L-NMMA<br>IC <sub>50</sub> : 28 µM                                                                                                                                                                               | lipopolysaccharide-activated mouse peritoneal macrophages                                                                 | [36] |
|                   | <i>Citrus hystrix</i>     | IC <sub>50</sub> : 310 µM                                                                                                                                | NO production assay/MTT   | In vitro | N-(iminoethyl)-L-ornithine (L-NIO)<br>IC <sub>50</sub> : 7.9 µM                                                                                                                                                  | RAW 264.7 macrophage cell                                                                                                 | [64] |
|                   | <i>Zanthoxylum flavum</i> | No activity                                                                                                                                              | 96-well microplates assay | In vitro | Chloroquine<br>IC <sub>50</sub> : 15.5 ng/mL on D6 clone<br>IC <sub>50</sub> : 170 ng/mL on W2 clone<br><br>Artemisinin<br>IC <sub>50</sub> : 10.3 ng/mL on D6 clone<br>IC <sub>50</sub> : 6.3 ng/mL on W2 clone | <i>Plasmodium falciparum</i>                                                                                              | [69] |
| Antimalarial      |                           |                                                                                                                                                          |                           |          |                                                                                                                                                                                                                  |                                                                                                                           |      |
| Antimicrobial     | <i>Angelica pancicii</i>  | MIC: 2.00 ± 0.03 mg/mL<br>MIC: 16.00 ± 0.05 mg/mL<br>MIC: 4.00 ± 0.04 mg/mL<br>MIC: 4.00 ± 0.01 mg/mL                                                    | Microbroth dilution       | In vitro | Streptomycin<br>MIC: 0.09 ± 0.00 mg/mL<br>MIC: 0.17 ± 0.02 mg/mL<br>MIC: 0.17 ± 0.01 mg/mL<br>MIC: 0.04 ± 0.00 mg/mL                                                                                             | <i>Bacillus cereus</i><br><i>Mucilaginibacter flavus</i><br><i>Listeria monocytogenes</i><br><i>Staphylococcus aureus</i> | [38] |

|                           |                                                                                                                                                    |                     |          |                                                                                                                                                                                                                                                                                |                                                                                                                                                                                                                                                       |      |
|---------------------------|----------------------------------------------------------------------------------------------------------------------------------------------------|---------------------|----------|--------------------------------------------------------------------------------------------------------------------------------------------------------------------------------------------------------------------------------------------------------------------------------|-------------------------------------------------------------------------------------------------------------------------------------------------------------------------------------------------------------------------------------------------------|------|
|                           | MIC: 4.00 ± 0.08 mg/mL<br>MIC: 16.00 ± 0.02 mg/mL<br>MIC: 16.00 ± 0.07 mg/mL<br>MIC: 4.00 ± 0.05 mg/mL                                             |                     |          | MIC: 0.17 ± 0.04 mg/mL<br>MIC: 0.17 ± 0.00 mg/mL<br>MIC: 0.26 ± 0.01 mg/mL<br>MIC: 0.17 ± 0.00 mg/mL                                                                                                                                                                           | <i>Pseudomonas aeruginosa</i><br><i>Escherichia coli</i><br><i>Enterobacter cloacae</i><br><i>Salmonella typhimurium</i>                                                                                                                              |      |
|                           | MBC: 4.00 ± 0.06 mg/mL<br>na<br>MBC: 16.00 ± 0.09 mg/mL<br>MBC 16.00 ± 0.05 mg/mL<br>MBC: 8.00 ± 0.02 mg/mL<br>na<br>na<br>MBC: 16.00 ± 0.07 mg/mL |                     |          | MBC: 0.37 ± 0.02 mg/mL<br>MBC: 0.37 ± 0.00 mg/mL<br>MBC: 0.49 ± 0.03 mg/mL<br>MBC: 0.37 ± 0.02 mg/mL<br>MBC: 1.24 ± 0.00 mg/mL<br>MBC: 0.49 ± 0.03 mg/mL<br>MBC: 0.74 ± 0.07 mg/mL<br>MBC: 0.49 ± 0.03 mg/mL                                                                   | <i>Bacillus cereus</i><br><i>Mucilaginibacter flavus</i><br><i>Listeria monocytogenes</i><br><i>Staphylococcus aureus</i><br><i>Pseudomonas aeruginosa</i><br><i>Escherichia coli</i><br><i>Enterobacter cloacae</i><br><i>Salmonella typhimurium</i> |      |
| <i>Angelica pancicii</i>  | COD: 8.66 ± 4.04 mm<br>BF: 10.60 ± 0.53% (0.5 MIC)<br>BF: 49.46 ± 0.93% (0.25 MIC)                                                                 | nd                  | nd       | Streptomycin<br>COD: 11.00 ± 1.00 mm<br>BF: 69.16 ± 0.65% (0.5 MIC)<br>BF: 56.46 ± 0.46% (0.25 MIC)<br>BF: 92.16 ± 0.37% (0.125 MIC)<br><br>Ampicillin<br>COD: 13.33 ± 5.03 mm<br>BF: 49.40 ± 0.46% (0.5 MIC)<br>BF: 70.97 ± 0.36% (0.25 MIC)<br>BF: 88.36 ± 0.42% (0.125 MIC) | <i>Pseudomonas aeruginosa</i> PAO1                                                                                                                                                                                                                    | [38] |
| <i>Prangos uloptera</i>   | No activity                                                                                                                                        | Disc diffusion      | In vitro | Gentamicin                                                                                                                                                                                                                                                                     | <i>Xanthomonas campestris</i><br><i>Erwinia cartovorum</i><br><i>Sclerotinia sclerotiorum</i>                                                                                                                                                         | [63] |
| <i>Anethum graveolens</i> | MIC: 128 µg/mL<br>MIC: 64 µg/mL<br>MIC: 32 µg/mL<br>MIC: 32 µg/mL<br>na                                                                            | Microbroth dilution | In vitro | Ethambutol<br>MIC: 4 µg/mL<br>MIC: 4 µg/mL<br>MIC: 0.5 µg/mL<br>MIC: 0.5 µg/mL<br>MIC: 128 µg/mL                                                                                                                                                                               | <i>Mycobacterium fortuitum</i> (ATCC-6841)<br><i>Mycobacterium phlei</i> (ATCC-11758)<br><i>Mycobacterium aurum</i> (PI-104482)<br><i>Mycobacterium smegmatis</i> (ATCC-14468)<br><i>Mycobacterium abscessus</i> (ATCC-9977)                          | [12] |
| <i>Ferulago trifida</i>   |                                                                                                                                                    | Disc diffusion      | In vitro | Gentamicin (at 10 µg/disc)                                                                                                                                                                                                                                                     |                                                                                                                                                                                                                                                       | [46] |



|                   |                      |                                                                                                                                                                                               |                       |                              |                                                                                                                                                                                                         |                                                                                                                                                                                 |      |
|-------------------|----------------------|-----------------------------------------------------------------------------------------------------------------------------------------------------------------------------------------------|-----------------------|------------------------------|---------------------------------------------------------------------------------------------------------------------------------------------------------------------------------------------------------|---------------------------------------------------------------------------------------------------------------------------------------------------------------------------------|------|
|                   |                      | MIC: 256 µg/mL<br>MIC: >256 µg/mL<br>MIC: >256 µg/mL                                                                                                                                          |                       |                              | MIC: 16 µg/mL<br>MIC: 64 µg/mL<br>-                                                                                                                                                                     | Enterococcus faecium<br>Pseudomonas aeruginosa<br>methicillin-resistant S. aureus (MRSA)                                                                                        |      |
|                   |                      |                                                                                                                                                                                               |                       |                              | Chloramphenicol<br>MIC: 8 µg/mL<br>MIC: 32 µg/mL<br>MIC: 64 µg/mL<br>MIC: >256 µg/mL<br>MIC: >256 µg/mL                                                                                                 | Staphylococcus aureus<br>Escherichia coli<br>Enterococcus faecium<br>Pseudomonas aeruginosa<br>methicillin-resistant S. aureus (MRSA)                                           |      |
| Antioxidant       | Angelica dahurica    | IC <sub>50</sub> : >200 µg/mL                                                                                                                                                                 | DPPH                  | In vitro                     | nd                                                                                                                                                                                                      | nd                                                                                                                                                                              | [23] |
|                   | Ferulago subvelutina | IC <sub>50</sub> : 217 µg/mL                                                                                                                                                                  | DPPH                  | In vitro                     | BHT<br>IC <sub>50</sub> : 27 µg/mL                                                                                                                                                                      | -                                                                                                                                                                               | [49] |
|                   | Ferulago trifida     | 9.15 ± 1.7 mm FSE/100 g                                                                                                                                                                       | FRAP                  | In vitro                     | BHT<br>267.2 ± 4.2 mmol FSE/100 g                                                                                                                                                                       | -                                                                                                                                                                               | [46] |
|                   | Prangos uloptera     | RC <sub>50</sub> : 51.25 mg/mL                                                                                                                                                                | DPPH                  | In vitro                     | nd                                                                                                                                                                                                      | nd                                                                                                                                                                              | [63] |
|                   | Zanthoxylum flavum   | IC <sub>50</sub> : 8.3 µg/mL                                                                                                                                                                  | cell-based<br>DCFH-DA | In vitro                     | Ascorbic acid<br>IC <sub>50</sub> : 1.4 µg/mL                                                                                                                                                           | -                                                                                                                                                                               | [69] |
| Antiproliferative | Angelica dahurica    | ED <sub>50</sub> : 9.5 ± 0.3 µg/mL<br>ED <sub>50</sub> : 19.3 ± 0.3 µg/mL<br>ED <sub>50</sub> : 16.5 ± 0.2 µg/mL<br>ED <sub>50</sub> : 16.1 ± 0.5 µg/mL<br>ED <sub>50</sub> : 3.4 ± 0.3 µg/mL | SRB                   | In vitro                     | Cisplatin<br>ED <sub>50</sub> : 1.4 ± 0.1 µg/mL<br>ED <sub>50</sub> : 0.9 ± 0.3 µg/mL<br>ED <sub>50</sub> : 0.8 ± 0.2 µg/mL<br>ED <sub>50</sub> : 0.9 ± 0.3 µg/mL<br>ED <sub>50</sub> : 2.2 ± 0.4 µg/mL | A549 (non-small cell lung)<br>SK-OV-3 (ovary cancer cell line)<br>SK-MEL-2 (melanoma cancer cell line)<br>XF498 (central nervous system cell)<br>HCT15 (colon cancer cell line) | [35] |
|                   |                      | IC <sub>50</sub> : 0.22 µM                                                                                                                                                                    |                       |                              | Psoralen<br>IC <sub>50</sub> : 0.11 µM                                                                                                                                                                  |                                                                                                                                                                                 |      |
|                   | Angelica dahurica    | TV: 500 mm <sup>3</sup> (at 0.5 mg/kg after 20 days)<br>TV: 900 mm <sup>3</sup> (at 1.0 mg/kg after 20 days)                                                                                  | -                     | In vitro<br><br>In vivo/mice | TV: 2200 mm <sup>3</sup>                                                                                                                                                                                | UVA-irradiated B16F10 melanoma                                                                                                                                                  | [27] |

|                      |                              |                                                                                                                                                    |                                         |          |                                                                                                                                                               |                                                                                                                                                           |      |
|----------------------|------------------------------|----------------------------------------------------------------------------------------------------------------------------------------------------|-----------------------------------------|----------|---------------------------------------------------------------------------------------------------------------------------------------------------------------|-----------------------------------------------------------------------------------------------------------------------------------------------------------|------|
|                      |                              | TW: 250 mg (at 0.5 mg/kg)<br>TW: 600 mg (at 1.0 mg/kg)                                                                                             |                                         |          | TW: 2000 mg                                                                                                                                                   |                                                                                                                                                           |      |
|                      | <i>Angelica dahurica</i>     | IC <sub>50</sub> : 50.8 µM<br>IC <sub>50</sub> : 95.5 µM<br>IC <sub>50</sub> : 50.4 µM<br>IC <sub>50</sub> : 32.4 µM<br>IC <sub>50</sub> : 46.3 µM | SRB                                     | In vitro | Etoposide<br><br>IC <sub>50</sub> : 0.3 µM                                                                                                                    | MDA-MB-231 (breast cancer cell)<br>T47D (breast cancer cell)<br>SNU638 (stomach cancer cell)<br>SK-Hep-1 (human hepatoma cell)<br>A549 (lung cancer cell) | [21] |
|                      | <i>Ducrosia anethifolia</i>  | IC <sub>50</sub> : 25.98 ± 1.27 µM<br>IC <sub>50</sub> : 28.89 ± 0.73 µM                                                                           | MTT                                     | In vitro | Doxorubicin<br>IC <sub>50</sub> : 0.054 ± 0.005 µM<br>IC <sub>50</sub> : 0.468 ± 0.065 µM                                                                     | PAR cell line<br>MDR cell line                                                                                                                            | [41] |
| Antiviral            | <i>Angelica dahurica</i>     | EC <sub>50</sub> : 5.98 ± 0.71 µM<br>EC <sub>50</sub> : 4.52 ± 0.39 µM                                                                             | nd                                      | In vitro | Ribavirin<br>EC <sub>50</sub> : 6.29 ± 0.89 µM<br>EC <sub>50</sub> : 6.13 ± 0.19 µM                                                                           | influenza A - H1N1<br>influenza A - H9N2                                                                                                                  | [20] |
|                      | <i>Prangos ferulacea</i>     | No activity                                                                                                                                        | nd                                      | In vitro | nd                                                                                                                                                            | Vero (African monkey kidney cell)                                                                                                                         | [61] |
| Calcium antagonistic | <i>Angelica archangelica</i> | I: 43 ± 4.3% (at 20 µg/mL)                                                                                                                         | <sup>45</sup> Ca <sup>2+</sup> - uptake | rat      | Verapamil<br>IC <sub>50</sub> : 2.0 ± 0.2 µg/mL                                                                                                               | Clonal pituitary GH <sub>4</sub> C <sub>1</sub> cells                                                                                                     | [13] |
|                      | <i>Angelica dahurica</i>     | EC <sub>50</sub> : 286.7 ± 6.36 µM                                                                                                                 | MTT                                     | In vitro | Silybin<br>EC <sub>50</sub> : 69.0 ± 3.4 µM                                                                                                                   | Hep G2 cell line                                                                                                                                          | [18] |
| Cytotoxic            | <i>Angelica dahurica</i>     | IC <sub>50</sub> : >30 µg/mL<br>IC <sub>50</sub> : 27.5 µg/mL<br>IC <sub>50</sub> : >30 µg/mL<br>IC <sub>50</sub> : >30 µg/mL                      | MTT                                     | In vitro | Doxorubicin (syn. Adriamycin)<br>IC <sub>50</sub> : 0.8 µg/mL<br>IC <sub>50</sub> : 2.8 µg/mL<br>IC <sub>50</sub> : 1.4 µg/mL<br>IC <sub>50</sub> : 0.9 µg/mL | L1210 (murine leukemia cancer cell)<br>HL-60 (human leukemia cancer cell)<br>K562 (human leukemia cancer cell)<br>B16F10 (murine melanoma cancer cell)    | [24] |
|                      | <i>Angelica koreanum</i>     | IC <sub>50</sub> : >20 µg/mL                                                                                                                       | MTT                                     | In vitro | Finasteride<br>IC <sub>50</sub> : >20 µg/mL                                                                                                                   | LNCaP cell                                                                                                                                                | [37] |
|                      | <i>Ducrosia anethifolia</i>  | IC <sub>50</sub> : 40.33 ± 0.63 µM<br>IC <sub>50</sub> : 66.68 ± 0.0 µM<br>IC <sub>50</sub> : 57.18 ± 3.91 µM                                      | MTT                                     | In vitro | Doxorubicin<br>IC <sub>50</sub> : 0.377 ± 0.02 µM<br>IC <sub>50</sub> : 7.152 ± 0.35 µM<br>IC <sub>50</sub> : 5.71 ± 0.50 µM                                  | PAR cell line<br>MDR cell line<br>NIH/3T3 cell line                                                                                                       | [41] |
|                      | <i>Ferulago trifida</i>      | IC <sub>50</sub> : 1.19 mM<br>IC <sub>50</sub> : 0.80 mM<br>IC <sub>50</sub> : 1.28 mM                                                             | MTT                                     | In vitro | Tamoxifen<br>IC <sub>50</sub> : 0.012 mM<br>IC <sub>50</sub> : 0.017 mM<br>IC <sub>50</sub> : 0.006 mM                                                        | MDA-MB-231 (breast cancer cell line)<br>A-549 (lung carcinoma cell line)                                                                                  | [46] |

|                   |                           |                                                                                                                                                                                                                                                                                                          |                                   |          |                                                                                         |                                                                               |       |
|-------------------|---------------------------|----------------------------------------------------------------------------------------------------------------------------------------------------------------------------------------------------------------------------------------------------------------------------------------------------------|-----------------------------------|----------|-----------------------------------------------------------------------------------------|-------------------------------------------------------------------------------|-------|
|                   |                           | IC <sub>50</sub> : 1.79 mM                                                                                                                                                                                                                                                                               |                                   |          | IC <sub>50</sub> : 0.030 mM                                                             | HT-29 (colon adenocarcinoma cell line)<br>MRC-5 (human fatal lung fibroblast) |       |
|                   |                           | ICG: 3.4% (at 25 μM after 24 h)<br>ICG: 43.5% (at 100 μM after 24 h)<br>ICG: 8.7% (at 25 μM after 48 h)<br>ICG: 76.2% (at 100 μM after 48 h)<br>ICG: 43.6% (at 25 μM after 72 h)<br>ICG: 93.3% (at 100 μM after 72 h)                                                                                    |                                   |          |                                                                                         |                                                                               |       |
|                   | <i>Ostericum koreanum</i> | CD: 19% (at 25 μM after 24 h)<br>CD: 22% (at 50 μM after 24 h)<br>CD: 28% (at 100 μM after 24 h)<br>CD: 18% (at 25 μM after 48 h)<br>CD: 25% (at 50 μM after 48 h)<br>CD: 35% (at 100 μM after 48 h)<br>CD: 15% (at 25 μM after 72 h)<br>CD: 32% (at 50 μM after 72 h)<br>CD: 50% (at 100 μM after 72 h) | trypan blue dye exclusion         | In vitro | nd                                                                                      | human prostate carcinoma DU145 cell                                           | [52]  |
|                   | <i>Ostericum koreanum</i> | CC <sub>50</sub> : 272.6 ± 6.9 μM                                                                                                                                                                                                                                                                        | MTT                               | In vitro | Etoposide<br>CC <sub>50</sub> : 46.9 ± 10.5 μM                                          | Mice neuroblastoma neuro-2A cell                                              | [51]  |
|                   | <i>Prangos uloptera</i>   | IC <sub>50</sub> : 314 μg/mL                                                                                                                                                                                                                                                                             | MTT                               | In vitro | nd                                                                                      | HeLa cell line                                                                | [63]  |
|                   | <i>Zanthoxylum flavum</i> | IC <sub>50</sub> : 8.9 μg/mL<br>No activity                                                                                                                                                                                                                                                              | XTT                               | In vitro | Doxorubicin<br>5-flurouracil                                                            | HL-60 (human leukemia cell line)<br>Vero cell line                            | [69]  |
|                   | purchased                 | P <sub>app</sub> (A→B): 0.47 ± 0.07 (× 10 <sup>-6</sup> cm/s) (at 3.82 μmol/L + VCR)<br>P <sub>app</sub> (A→B): 0.50 ± 0.04 (× 10 <sup>-6</sup> cm/s) (at 19.08 μmol/L + VCR)<br>P <sub>app</sub> (A→B): 0.52 ± 0.04 (× 10 <sup>-6</sup> cm/s) (at 76.30 μmol/L + VCR)                                   | MTT                               | In vitro | VCR (at 264.46 μmol/L)<br>P <sub>app</sub> (A→B): 0.37 ± 0.04 (× 10 <sup>-6</sup> cm/s) | MDCK-MDR1 cell monolayers                                                     | [106] |
| Enzyme inhibitory | <i>Angelica dahurica</i>  | IC <sub>50</sub> : 89.1 μM                                                                                                                                                                                                                                                                               | Ellman (AChE inhibitory activity) | In vitro | Berberine<br>IC <sub>50</sub> : 2.9 μM                                                  | -                                                                             | [17]  |
|                   | <i>Angelica dahurica</i>  | IC <sub>50</sub> : 69.3 ± 1.1 μg/mL                                                                                                                                                                                                                                                                      | Ellman                            | In vitro | Eserine                                                                                 | -                                                                             | [19]  |

|                              |                                                                                         |                               |                                                                                      |          |                                                               |                            |      |
|------------------------------|-----------------------------------------------------------------------------------------|-------------------------------|--------------------------------------------------------------------------------------|----------|---------------------------------------------------------------|----------------------------|------|
|                              |                                                                                         |                               | (AChE inhibitory activity)                                                           |          | IC <sub>50</sub> : 0.51 ± 0.03 µg/mL                          |                            |      |
| <i>Angelica dahurica</i>     | IC <sub>50</sub> : 359.2 ± 9.6 µM                                                       |                               | BACE1 inhibitory activity                                                            | In vitro | LTEEISEVD(Statine)VAEF-OH<br>IC <sub>50</sub> : 0.2 ± 0.01 µM | -                          | [22] |
| <i>Angelica koreana</i>      | IC <sub>50</sub> : >20 µg/mL                                                            |                               | testosterone 5α-reductase type I inhibitory                                          | In vitro | Finasteride<br>IC <sub>50</sub> : 19.8 µg/mL                  | LNCaP cell                 | [37] |
|                              |                                                                                         |                               | Anti-lipid peroxidation                                                              |          |                                                               |                            |      |
|                              | IC <sub>50</sub> : 91.27 µg/mL                                                          |                               | Ellman (AChE inhibitory activity)                                                    |          |                                                               |                            |      |
|                              | I: 19.36 ± 1.87% (against AChE)<br>I: 36.89 ± 1.23% (against BChE)                      |                               |                                                                                      |          |                                                               |                            |      |
| <i>Angelica purpurascens</i> | DS: -7.523 kcal/mol [against AChE (1EVE)]<br>DS: -4.232 kcal/mol [against BChE (1P0I)]  |                               | Molecular docking activity                                                           | In vitro | -                                                             | -                          | [39] |
|                              | IC <sub>50</sub> : 6.72 ± 0.98 µM (hCA I)<br>IC <sub>50</sub> : 5.29 ± 0.98 µM (hCA II) |                               | Carbonic anhydrase isoenzymes I and II inhibition (cytosolic isoenzyme hCA I and II) |          |                                                               |                            |      |
| <i>Levisticum officinale</i> | DS: -7.764 kcal/mol [against 2-trans-enoyl-ACP reductase (InhA)]                        |                               | Molecular docking activity                                                           |          | Isoniazid<br>DS: -6.013 kcal/mol                              | -                          | [60] |
| Insecticidal                 | <i>Ferulago trifida</i>                                                                 | LC <sub>50</sub> : 116.54 ppm | WHO                                                                                  | In vitro | na                                                            | <i>Anopheles stephensi</i> | [45] |

|            |                             | LC <sub>90</sub> : 346.41 ppm                       | protocol      |          |   |                                  |      |
|------------|-----------------------------|-----------------------------------------------------|---------------|----------|---|----------------------------------|------|
| Phytotoxic | <i>Petroselinum crispum</i> | GI: 70.21 ± 9.96% (of control)                      | Lettuce assay | In vitro | - | <i>Lactuca sativa</i> (0.06 g/L) | [56] |
|            |                             | TG: 93.33 ± 7.63% (of control)                      |               |          |   |                                  |      |
|            |                             | RL: 26.41 ± 15.88% (of control)                     |               |          |   |                                  |      |
|            |                             | SL: -24.37 ± 7.63% (of control)                     |               |          |   |                                  |      |
|            | <i>Prangos uloptera</i>     | IC <sub>50</sub> : 0.21 mg/mL (in seed germination) | Lettuce assay | In vitro | - | <i>Lactuca sativa</i>            | [63] |
|            |                             | IC <sub>50</sub> : 0.59 mg/mL (in shoot growth)     |               |          |   |                                  |      |
|            |                             | IC <sub>50</sub> : 0.62 mg/mL (in root growth)      |               |          |   |                                  |      |

AChE: acetylcholinesterase enzyme, AF-2: furylfuramide, AI: antifeedant index, BACE1:  $\beta$ -secretase, BChE: butyrylcholinesterase enzyme, BF: biofilm formation, BHT: butylated hydroxytoluene, C: concentration, CC<sub>50</sub>: 50% cytotoxic concentration, CD: cell death, COD: colony diameter, DCFH-DA: dichloro-dihydro-fluorescein diacetate, DNP-HSA: dinitrophenyl-human serum albumin, DPPH: 2,2-diphenyl-1-picrylhydrazyl, DS: dock score, EC<sub>50</sub>: half maximal effective concentration, ED<sub>50</sub>: median effective dose, FRAP: Ferric reducing antioxidant power, FSE: ferrous sulphate equivalent, GI: germination index, HC: histamine content, hCA: human carbonic anhydrase, I: inhibition, IC<sub>50</sub>: half maximal inhibitory concentration, ICG: inhibition of cell growth, I<sub>GABA</sub>: GABA-induced chloride currents, IL-1 $\beta$ : interleukin, IZ: inhibition zone, LC<sub>50</sub>: 50% lethal dose, LC<sub>90</sub>: 90% lethal dose, L-NAME: L-N<sup>G</sup>-Nitro arginine methyl ester, L-NMMA: N<sup>G</sup>-monomethyl-L-arginine, L-NIO: N-(iminoethyl)-L-ornithine, LNCaP: androgen-sensitive human prostate adenocarcinoma, MBC: minimum bactericidal concentration, MDCK: Mardin Darby canine kidney cell, MelQ: 2-amino-3,4-di-methylimidazo[4,5-f]quinoline, MIC: minimum inhibitory concentration, MNNG: N-methyl-N'-nitro-N-nitrosoguanidine, MTT: 3-(4,5-Dimethylthiazol-2-yl)-2,5-diphenyltetrazolium bromide, na: not analysed, nd: not determined, NIH/3T3: mice embryonic fibroblast cell line, NO: nitric oxide, P<sub>app</sub>: apparent permeability, PBTA-4: procarcinogen: 2-[2-(acetylamino)24-amino-5-methoxyphenyl]25-amino-7-bromo-4-chloro-2H-benzotriazole, PI: Pasteur institute, RAW 264.7: murine macrophage cell line, RBL-2H3: rat basophilic leukemia, RC<sub>50</sub>: 50% reactive concentration, RL: root length, SL: shoot length, SRB: sulforhodamine B, TG: total germination, TNF- $\alpha$ : tumour necrosis factor, TV: tumour volume, TW: tumour weight, VCR: vincristine sulphate.
